# Supplementary material
Source: MDPI journal article supplement (https://www.mdpi.com/2304-6740/11/3/120)
Supplement: s1 [file s1]

## Supplementary Information

### **Nickel(II) *N*-heterocyclic carbene complex for the hydrogenation of 2-acetylpyridine under mild conditions**

Mitu Sharma <sup>1</sup>, Amanda M. Perkins <sup>1</sup>, Alison K. Duckworth <sup>1</sup>, Emily J. Rouse <sup>1</sup>, Bruno Donnadieu <sup>1</sup>, Bhupendra Adhikari <sup>1</sup>, Sean L. Stokes <sup>1,\*</sup>, and Joseph P. Emerson <sup>1,\*</sup>

<sup>1</sup>*Department of Chemistry, Mississippi State University, Mississippi State, MS 39762-9573*

*\*Correspondence: jemerson@chemistry.msstate.edu; Tel.: 1.662.325.4633*

## Table of Contents

|                                                                                                                        |            |
|------------------------------------------------------------------------------------------------------------------------|------------|
| Synthesis of <b>1</b> and <b>2</b>                                                                                     | Page 3     |
| Crystal Structure Report for complex <b>3</b>                                                                          | Page 4     |
| <b>Figure S1:</b> Crystal pictures of <b>3</b>                                                                         | Page 5     |
| <b>Figure S2:</b> Asymmetric unit of <b>3</b>                                                                          | Page 6     |
| <b>Table S1:</b> Sample and crystal data for <b>3</b>                                                                  | Page 7     |
| <b>Table S2:</b> Data collection and structure refinement for <b>3</b>                                                 | Page 8     |
| <b>Table S3:</b> Atomic coordinates and equivalent isotropic atomic displacement for <b>3</b>                          | Page 9-11  |
| <b>Table S4:</b> Bond lengths for <b>3</b>                                                                             | Page 12-13 |
| <b>Table S5:</b> Bond angles for <b>3</b>                                                                              | Page 14-15 |
| <b>Table S6:</b> Torsion angles for <b>3</b>                                                                           | Page 16-17 |
| <b>Table S7:</b> Anisotropic atomic displacement parameters for <b>3</b>                                               | Page 18-20 |
| <b>Table S8:</b> Hydrogen atomic coordinates and isotropic atomic displacement for <b>3</b>                            | Page 21-22 |
| <b>Figure S3:</b> FT-IR of compound <b>2</b> and complex <b>3</b>                                                      | Page 23    |
| <b>Figure S4:</b> A typical GC spectrum for the reduction of 2-acetylpyridine                                          | Page 23    |
| <b>Figure S5:</b> Plot for the % conversion of 1-(pyridin-2-yl)ethan-1-ol catalyzed by <b>3</b> as a function of time. | Page 24    |
| <b>Figure S6:</b> <sup>1</sup> H NMR of complex <b>3</b>                                                               | Page 25    |
| <b>Figure S7:</b> <sup>13</sup> C NMR of complex <b>3</b>                                                              | Page 26    |
| <b>Figure S8:</b> ESI-MS of complex <b>3</b> in CH <sub>3</sub> CN solution                                            | Page 27    |
| <b>References</b>                                                                                                      | Page 27    |

### **Synthesis of 1,3-bis(pyridin-2-ylmethyl)-1H-benzo[d]imidazol-3-ium chloride (1)**

The compound **1** was synthesized a method previously employed by our group [19]. A mixture of 2-picolyl chloride hydrochloride (5.93 g, 36.15 mmol), benzimidazole (2.13 g, 18.08 mmol), and sodium carbonate (4.55 g, 42.92 mmol) was mixed in 25 mL of ethanol in a 50 mL round bottom flask and refluxed for 36 h [19]. The solvent was removed completely under reduced pressure. The residue was redissolved in di-chloromethane (DCM) (20 mL) and dried over CaSO<sub>4</sub>. This solution was filtered, and the DCM was removed under reduced pressure. The oily residue obtained was washed with THF (2×10 mL), giving dark brown solid (2).

### **Synthesis of 1,3-bis(pyridin-2-ylmethyl)-1H-benzo[d]imidazol-3-ium hexafluorophosphate (2)**

1,3-Bis(pyridin-2-ylmethyl)-1H-benzo[d]imidazol-3-ium chloride (0.168 g, 0.5 mmol) was dissolved in a minimum amount of H<sub>2</sub>O, followed by the addition of 5 equivalents of ammonium hexafluorophosphate (0.407 g, 2.5 mmol). A brown precipitate (2a) was obtained and dried under vacuum. This procedure was previously employed by our group [19].

### Crystal Structure Report for complex 3

A yellow single prism like single crystal  $C_{38.5}H_{33.5}F_{12}N_8NiO_{0.5}P_2$ , approximate dimensions ( 0.272 x 0.309 x 0.517 ) mm<sup>3</sup>, was selected for the X-ray crystallographic analysis and mounted on a cryoloop using an oil cryoprotectant. The X-ray intensity data was measured at low temperature (T = 270K), using a three circles goniometer Kappa geometry with a fixed Kappa angle at = 54.74 deg Bruker AXS D8 Venture, equipped with a Photon 100 CMOS active pixel sensor detector. A monochromatized Cu X-ray radiation ( $\lambda = 0.71073 \text{ \AA}$ ) was selected for the measurement. All frames were integrated with the aid of the Bruker SAINT software <sup>1</sup> using a narrow-frame algorithm. The integration of the data using a monoclinic unit cell yielded a total of 70456 reflections to a maximum  $\theta$  angle of 26.21° (0.80 Å resolution), of which 8819 were independent (average redundancy 7.989, completeness = 98.4%,  $R_{int} = 9.68\%$ ,  $R_{sig} = 5.04\%$ ) and 6000 (68.03%) were greater than  $2\sigma (F^2)$ . The final cell constants of  $a = 38.42(4) \text{ \AA}$ ,  $b = 12.109(11) \text{ \AA}$ ,  $c = 19.832(18) \text{ \AA}$ ,  $\beta = 104.67(3)^\circ$ , volume = 8926. (15) Å<sup>3</sup>, are based upon the refinement of the XYZ-centroids of 1357 reflections above  $20 \sigma (I)$  with  $4.383^\circ < 2\theta < 48.13^\circ$ . Data were corrected for absorption effects using the Multi-Scan method (SADABS) <sup>2</sup>. The ratio of minimum to maximum apparent transmission was 0.888. The calculated minimum and maximum transmission coefficients (based on crystal size) are 0.7480 and 0.8550. Structure was solved in a monoclinic unit cell; Space group: C 1 2/c 1, with Z = 8 for the formula unit, C77 H67 F24 N16 Ni2 O P4. Using the Bruker SHELXT Software Package <sup>3</sup>, refinement of the structure was carried out by least squares procedures on weighted  $F^2$  values using the SHELXTL-2018/3 <sup>4</sup> included in the APEX4 v2021,10.0, AXS Bruker program <sup>5</sup>. A six members ring was located statistically disordered on two positions and anisotropically refined using 50% occupancy. Two PF<sub>6</sub><sup>-</sup> anions were depicted in the unit cell crystallized with the Ni complex, ones was found statistically distributed and anisotropically refined with a ratio of occupancy equal to: 50%. Interatomic lengths and angles were restrained and constraints were added on ADP's parameters. Finally a half molecule of solvent of crystallization; Methanol: CH<sub>3</sub>OH was also localized. The final anisotropic full-matrix least-squares refinement on  $F^2$  with 687 variables converged at  $R1 = 10.71\%$ , for the observed data and  $wR2 = 30.63\%$  for all data. The goodness-of-fit: GOF was 1.093. The largest peak in the final difference electron density synthesis was 1.442 e<sup>-</sup>/Å<sup>3</sup> and the largest hole was -1.224 e<sup>-</sup>/Å<sup>3</sup> with an RMS deviation of 0.116 e<sup>-</sup>/Å<sup>3</sup>. Based on the final model, the calculated density was 1.436 g/cm<sup>3</sup> and F (000), 3924 e<sup>-</sup>. Graphics were performed using softwares: Mercury V.4.2.0:

(<https://www.ccdc.cam.ac.uk/>) and POV-Ray v 3.7: (The Persistence of Vision Raytracer, high quality, Free Software tool).

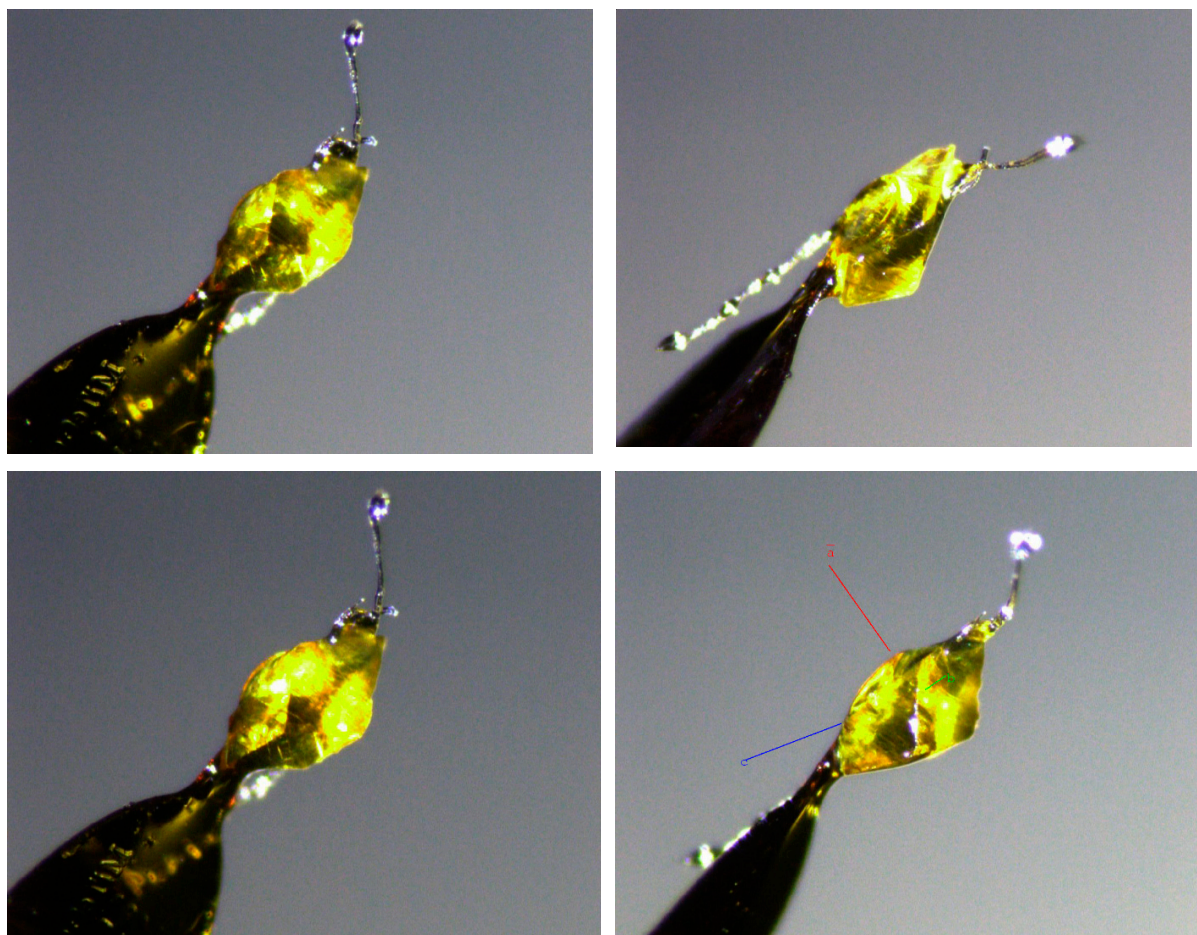

**Figure S1.** Crystal pictures of **3**

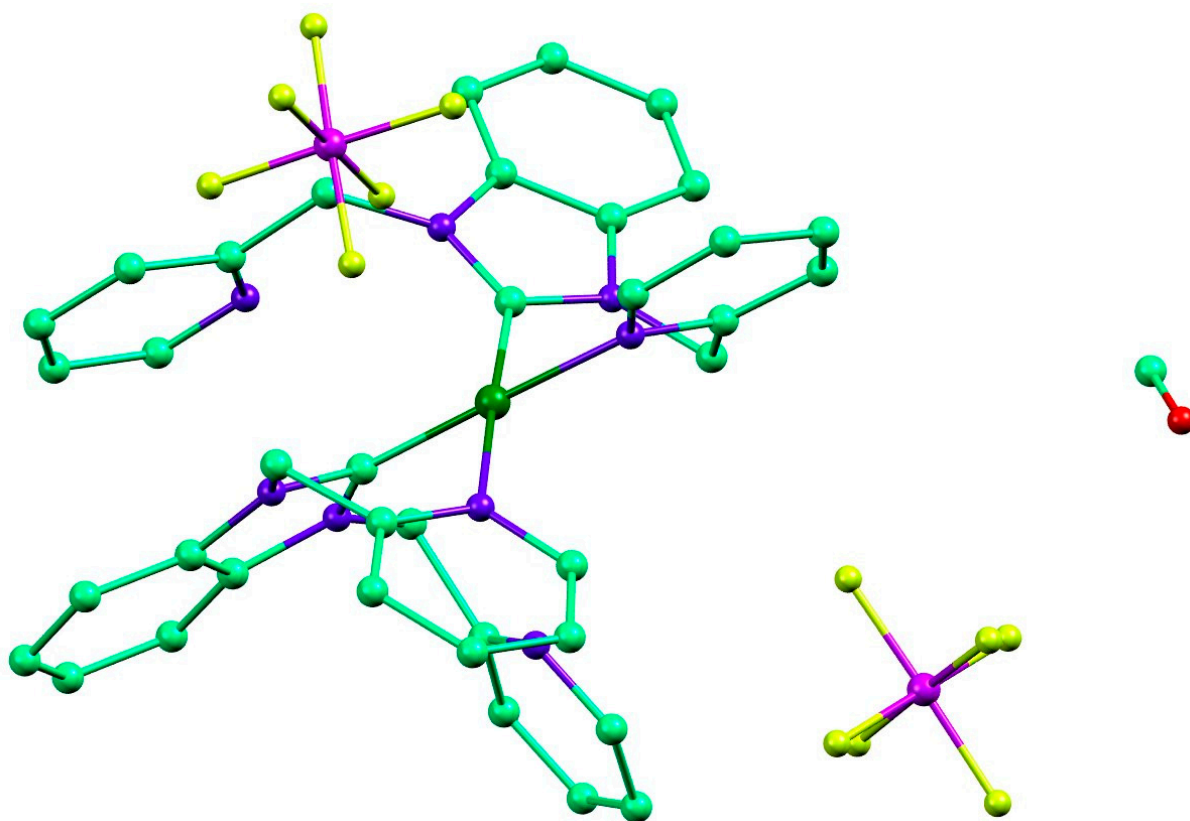

**Figure S2.** Asymmetric unit of **3**

***Table S1. Sample and crystal data for 3.***

---

|                               |                                                                                                      |                |
|-------------------------------|------------------------------------------------------------------------------------------------------|----------------|
| <b>Chemical formula</b>       | C <sub>38.5</sub> H <sub>33.5</sub> F <sub>12</sub> N <sub>8</sub> NiO <sub>0.5</sub> P <sub>2</sub> |                |
| <b>Formula weight</b>         | 964.88 g/mol                                                                                         |                |
| <b>Temperature</b>            | 270(2) K                                                                                             |                |
| <b>Wavelength</b>             | 0.71073 Å                                                                                            |                |
| <b>Crystal size</b>           | (0.272 x 0.309 x 0.517) mm <sup>3</sup>                                                              |                |
| <b>Crystal system</b>         | monoclinic                                                                                           |                |
| <b>Space group</b>            | C 1 2/c 1                                                                                            |                |
| <b>Unit cell dimensions</b>   | a = 38.42(4) Å                                                                                       | α = 90°        |
|                               | b = 12.109(11) Å                                                                                     | β = 104.67(3)° |
|                               | c = 19.832(18) Å                                                                                     | γ = 90°        |
| <b>Volume</b>                 | 8926.(15) Å <sup>3</sup>                                                                             |                |
| <b>Z</b>                      | 8                                                                                                    |                |
| <b>Density (calculated)</b>   | 1.436 g/cm <sup>3</sup>                                                                              |                |
| <b>Absorption coefficient</b> | 0.596 mm <sup>-1</sup>                                                                               |                |
| <b>F(000)</b>                 | 3924                                                                                                 |                |

**Table S2. Data collection and structure refinement for 3.**

---

|                                            |                                                                                                          |
|--------------------------------------------|----------------------------------------------------------------------------------------------------------|
| <b>Theta range for data collection</b>     | 1.99 to 26.21°                                                                                           |
| <b>Index ranges</b>                        | -47<= <i>h</i> <=47, -14<= <i>k</i> <=14, -24<= <i>l</i> <=24                                            |
| <b>Reflections collected</b>               | 70456                                                                                                    |
| <b>Independent reflections</b>             | 8819 [R(int) = 0.0968]                                                                                   |
| <b>Coverage of independent reflections</b> | 98.4%                                                                                                    |
| <b>Absorption correction</b>               | Multi-Scan                                                                                               |
| <b>Max. and min. transmission</b>          | 0.8550 and 0.7480                                                                                        |
| <b>Refinement method</b>                   | Full-matrix least-squares on F <sup>2</sup>                                                              |
| <b>Refinement program</b>                  | SHELXL-2019/1 (Sheldrick, 2019)                                                                          |
| <b>Function minimized</b>                  | $\sum w(F_o^2 - F_c^2)^2$                                                                                |
| <b>Data / restraints / parameters</b>      | 8819 / 667 / 687                                                                                         |
| <b>Goodness-of-fit on F<sup>2</sup></b>    | 1.093                                                                                                    |
| <b><math>\Delta/\sigma_{\max}</math></b>   | 0.001                                                                                                    |
| <b>Final R indices</b>                     | 6000 data; I>2σ(I)    R1 = 0.1071, wR2 = 0.2774<br>all data                    R1 = 0.1500, wR2 = 0.3063 |
| <b>Weighting scheme</b>                    | w=1/[σ <sup>2</sup> (F <sub>o</sub> <sup>2</sup> )+(0.1107P) <sup>2</sup> +111.1577P]                    |
| <b>Extinction coefficient</b>              | 0.0017(2)                                                                                                |
| <b>Largest diff. peak and hole</b>         | 1.442 and -1.224 eÅ <sup>-3</sup>                                                                        |
| <b>R.M.S. deviation from mean</b>          | 0.116 eÅ <sup>-3</sup>                                                                                   |



**Table S3. Atomic coordinates and equivalent isotropic atomic displacement parameters ( $\text{\AA}^2$ ) for 3.**

*U(eq)* is defined as one third of the trace of the orthogonalized  $U_{ij}$  tensor.

|     | <b>x/a</b>  | <b>y/b</b> | <b>z/c</b> | <b>U(eq)</b> |
|-----|-------------|------------|------------|--------------|
| Ni1 | 0.36368(2)  | 0.36130(7) | 0.68595(5) | 0.0417(3)    |
| N1  | 0.40525(16) | 0.1522(5)  | 0.6997(4)  | 0.0539(16)   |
| N2  | 0.39552(16) | 0.2187(5)  | 0.7964(4)  | 0.0515(15)   |
| N3  | 0.31189(15) | 0.1968(5)  | 0.6057(3)  | 0.0414(13)   |
| N4  | 0.33144(17) | 0.3217(5)  | 0.5453(3)  | 0.0450(14)   |
| N5  | 0.33906(15) | 0.4956(5)  | 0.6451(3)  | 0.0423(13)   |
| N6  | 0.39513(16) | 0.4445(5)  | 0.7617(3)  | 0.0517(15)   |
| C1  | 0.38796(18) | 0.2335(6)  | 0.7250(4)  | 0.0446(16)   |
| C2  | 0.4179(2)   | 0.1274(7)  | 0.8152(5)  | 0.064(2)     |
| C3  | 0.4322(3)   | 0.0786(9)  | 0.8801(7)  | 0.091(3)     |
| C4  | 0.4547(3)   | 0.9866(10) | 0.8804(10) | 0.122(5)     |
| C5  | 0.4612(3)   | 0.9460(9)  | 0.8188(9)  | 0.109(5)     |
| C6  | 0.4469(3)   | 0.9942(8)  | 0.7550(7)  | 0.085(3)     |
| C7  | 0.4247(2)   | 0.0857(7)  | 0.7538(6)  | 0.064(2)     |
| C8  | 0.33354(19) | 0.2854(6)  | 0.6108(4)  | 0.0428(16)   |
| C9  | 0.29527(18) | 0.1756(6)  | 0.5342(4)  | 0.0449(16)   |
| C10 | 0.2712(2)   | 0.0946(7)  | 0.5027(4)  | 0.057(2)     |
| C11 | 0.2604(2)   | 0.1002(8)  | 0.4287(5)  | 0.063(2)     |
| C12 | 0.2731(2)   | 0.1806(8)  | 0.3903(4)  | 0.066(2)     |
| C13 | 0.2972(2)   | 0.2611(7)  | 0.4231(4)  | 0.057(2)     |
| C14 | 0.30771(19) | 0.2567(6)  | 0.4956(4)  | 0.0449(16)   |
| C15 | 0.3477(2)   | 0.4285(7)  | 0.5339(4)  | 0.060(2)     |
| C16 | 0.3340(2)   | 0.5162(6)  | 0.5763(4)  | 0.0461(17)   |
| C17 | 0.3246(2)   | 0.5652(6)  | 0.6831(4)  | 0.0499(17)   |
| C18 | 0.3056(2)   | 0.6577(7)  | 0.6568(5)  | 0.061(2)     |
| C19 | 0.3020(3)   | 0.6834(8)  | 0.5867(5)  | 0.076(3)     |
| C20 | 0.3160(3)   | 0.6109(7)  | 0.5455(5)  | 0.069(2)     |
| C21 | 0.3851(2)   | 0.3008(7)  | 0.8421(4)  | 0.057(2)     |
| C22 | 0.4008(2)   | 0.4125(6)  | 0.8286(4)  | 0.060(2)     |
| C23 | 0.4212(3)   | 0.4739(9)  | 0.8835(6)  | 0.101(4)     |
| C24 | 0.4383(4)   | 0.5705(10) | 0.8653(8)  | 0.140(7)     |
| C25 | 0.4328(3)   | 0.6005(10) | 0.7985(7)  | 0.111(5)     |

|      | <b>x/a</b>  | <b>y/b</b>  | <b>z/c</b>  | <b>U(eq)</b> |
|------|-------------|-------------|-------------|--------------|
| C26  | 0.30239(19) | 0.1398(6)   | 0.6646(4)   | 0.0453(16)   |
| C27  | 0.4116(2)   | 0.5358(7)   | 0.7472(5)   | 0.069(2)     |
| C28  | 0.4076(3)   | 0.1403(8)   | 0.6285(6)   | 0.077(3)     |
| N8A  | 0.4419(5)   | 0.3206(18)  | 0.6491(10)  | 0.138(8)     |
| C29A | 0.4421(5)   | 0.2166(16)  | 0.6266(9)   | 0.082(7)     |
| C30A | 0.4665(6)   | 0.1768(16)  | 0.5918(11)  | 0.102(8)     |
| C31A | 0.4924(5)   | 0.249(2)    | 0.5794(12)  | 0.127(9)     |
| C32A | 0.4926(6)   | 0.356(2)    | 0.6023(13)  | 0.139(9)     |
| C33A | 0.4671(6)   | 0.3896(17)  | 0.6368(13)  | 0.148(9)     |
| N8B  | 0.4272(4)   | 0.3146(11)  | 0.6008(8)   | 0.077(5)     |
| C29B | 0.4313(4)   | 0.2053(12)  | 0.5966(8)   | 0.065(5)     |
| C30B | 0.4576(5)   | 0.1564(14)  | 0.5700(10)  | 0.093(7)     |
| C31B | 0.4811(5)   | 0.2245(19)  | 0.5462(10)  | 0.104(7)     |
| C32B | 0.4773(4)   | 0.3374(18)  | 0.5501(10)  | 0.100(7)     |
| C33B | 0.4501(5)   | 0.3796(14)  | 0.5776(9)   | 0.105(7)     |
| N7   | 0.33933(19) | 0.9842(5)   | 0.6474(4)   | 0.0634(18)   |
| C34  | 0.32505(19) | 0.0401(6)   | 0.6921(4)   | 0.0508(18)   |
| C35  | 0.3294(3)   | 0.0103(8)   | 0.7613(4)   | 0.076(3)     |
| C36  | 0.3494(3)   | 0.9158(10)  | 0.7854(6)   | 0.105(4)     |
| C37  | 0.3646(3)   | 0.8578(8)   | 0.7400(8)   | 0.110(5)     |
| C38  | 0.3590(3)   | 0.8939(7)   | 0.6716(7)   | 0.090(4)     |
| P1   | 0.28078(6)  | 0.40409(19) | 0.82620(11) | 0.0571(6)    |
| F1   | 0.26481(18) | 0.4436(7)   | 0.8884(3)   | 0.122(3)     |
| F2   | 0.2963(2)   | 0.2993(5)   | 0.8678(3)   | 0.117(2)     |
| F3   | 0.29795(14) | 0.3676(4)   | 0.7639(2)   | 0.0708(14)   |
| F4   | 0.26586(17) | 0.5120(5)   | 0.7848(3)   | 0.102(2)     |
| F5   | 0.24460(15) | 0.3467(6)   | 0.7908(3)   | 0.110(2)     |
| F6   | 0.31741(16) | 0.4652(6)   | 0.8600(4)   | 0.118(3)     |
| P2A  | 0.4462(2)   | 0.7368(6)   | 0.5841(4)   | 0.060(2)     |
| F1A  | 0.4126(3)   | 0.6714(14)  | 0.5956(8)   | 0.148(8)     |
| F2A  | 0.4298(5)   | 0.7358(15)  | 0.5045(5)   | 0.142(8)     |
| F3A  | 0.4809(3)   | 0.7998(15)  | 0.5728(8)   | 0.184(10)    |
| F4A  | 0.4634(5)   | 0.7356(18)  | 0.6647(5)   | 0.191(9)     |
| F5A  | 0.4279(5)   | 0.8479(10)  | 0.5936(12)  | 0.185(9)     |
| F6A  | 0.4659(5)   | 0.6251(11)  | 0.5761(13)  | 0.215(11)    |
| P2B  | 0.4407(3)   | 0.7199(9)   | 0.5848(5)   | 0.102(4)     |
| F1B  | 0.4244(5)   | 0.6002(11)  | 0.5855(11)  | 0.176(9)     |
| F2B  | 0.4045(4)   | 0.7616(17)  | 0.5383(11)  | 0.214(11)    |
| F3B  | 0.4572(6)   | 0.8417(11)  | 0.5861(11)  | 0.199(11)    |

|     | <b>x/a</b> | <b>y/b</b> | <b>z/c</b> | <b>U(eq)</b> |
|-----|------------|------------|------------|--------------|
| F4B | 0.4772(4)  | 0.6783(16) | 0.6332(11) | 0.213(11)    |
| F5B | 0.4551(6)  | 0.6872(18) | 0.5211(9)  | 0.180(10)    |
| F6B | 0.4272(6)  | 0.7533(17) | 0.6507(9)  | 0.190(9)     |
| O1S | 0.3544(3)  | 0.9991(10) | 0.4991(7)  | 0.068(3)     |
| C1S | 0.3407(5)  | 0.9139(15) | 0.4656(9)  | 0.066(4)     |

**Table S4. Bond lengths (Å) for 3.**

---

|           |           |           |           |
|-----------|-----------|-----------|-----------|
| Ni1-C1    | 1.871(7)  | Ni1-C8    | 1.879(7)  |
| Ni1-N5    | 1.951(6)  | Ni1-N6    | 1.952(6)  |
| N1-C1     | 1.353(9)  | N1-C7     | 1.398(11) |
| N1-C28    | 1.446(12) | N2-C1     | 1.384(10) |
| N2-C2     | 1.394(10) | N2-C21    | 1.467(10) |
| N3-C8     | 1.346(9)  | N3-C9     | 1.423(9)  |
| N3-C26    | 1.480(9)  | N4-C8     | 1.354(9)  |
| N4-C14    | 1.403(9)  | N4-C15    | 1.479(9)  |
| N5-C17    | 1.342(9)  | N5-C16    | 1.353(9)  |
| N6-C27    | 1.341(10) | N6-C22    | 1.347(11) |
| C2-C3     | 1.396(14) | C2-C7     | 1.402(13) |
| C3-C4     | 1.409(16) | C4-C5     | 1.40(2)   |
| C5-C6     | 1.375(18) | C6-C7     | 1.394(12) |
| C9-C10    | 1.385(10) | C9-C14    | 1.402(10) |
| C10-C11   | 1.421(12) | C11-C12   | 1.399(13) |
| C12-C13   | 1.388(12) | C13-C14   | 1.393(10) |
| C15-C16   | 1.528(11) | C16-C20   | 1.398(11) |
| C17-C18   | 1.366(11) | C18-C19   | 1.397(13) |
| C19-C20   | 1.396(14) | C21-C22   | 1.531(12) |
| C22-C23   | 1.387(12) | C23-C24   | 1.431(18) |
| C24-C25   | 1.339(19) | C25-C27   | 1.375(14) |
| C26-C34   | 1.508(10) | C28-C29B  | 1.463(17) |
| C28-C29A  | 1.622(18) | N8A-C29A  | 1.337(10) |
| N8A-C33A  | 1.347(11) | C29A-C30A | 1.384(10) |
| C30A-C31A | 1.393(13) | C31A-C32A | 1.379(16) |
| C32A-C33A | 1.391(16) | N8B-C29B  | 1.338(10) |
| N8B-C33B  | 1.348(11) | C29B-C30B | 1.384(10) |
| C30B-C31B | 1.393(13) | C31B-C32B | 1.379(16) |
| C32B-C33B | 1.390(16) | N7-C34    | 1.338(9)  |
| N7-C38    | 1.347(10) | C34-C35   | 1.388(10) |
| C35-C36   | 1.393(12) | C36-C37   | 1.380(15) |
| C37-C38   | 1.389(16) | P1-F2     | 1.548(6)  |
| P1-F5     | 1.554(6)  | P1-F4     | 1.572(6)  |
| P1-F6     | 1.581(6)  | P1-F1     | 1.584(5)  |
| P1-F3     | 1.602(5)  | P2A-F2A   | 1.546(7)  |
| P2A-F5A   | 1.552(7)  | P2A-F4A   | 1.567(7)  |

|         |          |         |          |
|---------|----------|---------|----------|
| P2A-F6A | 1.578(7) | P2A-F1A | 1.580(6) |
| P2A-F3A | 1.601(6) | P2B-F2B | 1.548(7) |
| P2B-F5B | 1.552(7) | P2B-F4B | 1.567(7) |
| P2B-F6B | 1.577(7) | P2B-F1B | 1.581(6) |
| P2B-F3B | 1.601(6) | O1S-C1S | 1.27(2)  |

**Table S5. Bond angles (°) for 3.**

---

|               |           |               |           |
|---------------|-----------|---------------|-----------|
| C1-Ni1-C8     | 93.8(3)   | C1-Ni1-N5     | 179.1(3)  |
| C8-Ni1-N5     | 86.7(3)   | C1-Ni1-N6     | 87.8(3)   |
| C8-Ni1-N6     | 177.9(3)  | N5-Ni1-N6     | 91.7(3)   |
| C1-N1-C7      | 110.7(7)  | C1-N1-C28     | 126.4(7)  |
| C7-N1-C28     | 122.6(7)  | C1-N2-C2      | 109.4(7)  |
| C1-N2-C21     | 121.7(6)  | C2-N2-C21     | 128.3(7)  |
| C8-N3-C9      | 109.4(6)  | C8-N3-C26     | 125.7(6)  |
| C9-N3-C26     | 124.4(6)  | C8-N4-C14     | 111.2(6)  |
| C8-N4-C15     | 120.4(6)  | C14-N4-C15    | 127.4(6)  |
| C17-N5-C16    | 118.5(6)  | C17-N5-Ni1    | 121.2(5)  |
| C16-N5-Ni1    | 120.2(5)  | C27-N6-C22    | 118.8(7)  |
| C27-N6-Ni1    | 119.7(6)  | C22-N6-Ni1    | 121.5(5)  |
| N1-C1-N2      | 106.8(6)  | N1-C1-Ni1     | 133.6(6)  |
| N2-C1-Ni1     | 118.9(5)  | N2-C2-C3      | 130.9(10) |
| N2-C2-C7      | 107.0(8)  | C3-C2-C7      | 122.2(9)  |
| C2-C3-C4      | 115.8(13) | C5-C4-C3      | 121.2(13) |
| C6-C5-C4      | 122.6(11) | C5-C6-C7      | 116.8(12) |
| C6-C7-N1      | 132.6(10) | C6-C7-C2      | 121.3(10) |
| N1-C7-C2      | 106.1(7)  | N3-C8-N4      | 107.5(6)  |
| N3-C8-Ni1     | 134.0(5)  | N4-C8-Ni1     | 118.5(5)  |
| C10-C9-C14    | 122.1(7)  | C10-C9-N3     | 131.1(7)  |
| C14-C9-N3     | 106.8(6)  | C9-C10-C11    | 114.8(8)  |
| C12-C11-C10   | 123.0(8)  | C13-C12-C11   | 121.2(8)  |
| C12-C13-C14   | 116.1(8)  | C13-C14-C9    | 122.8(7)  |
| C13-C14-N4    | 132.1(7)  | C9-C14-N4     | 105.1(6)  |
| N4-C15-C16    | 107.8(6)  | N5-C16-C20    | 121.4(7)  |
| N5-C16-C15    | 116.5(7)  | C20-C16-C15   | 122.1(7)  |
| N5-C17-C18    | 123.9(8)  | C17-C18-C19   | 118.2(8)  |
| C20-C19-C18   | 119.1(8)  | C19-C20-C16   | 118.9(8)  |
| N2-C21-C22    | 108.1(7)  | N6-C22-C23    | 122.5(9)  |
| N6-C22-C21    | 117.0(6)  | C23-C22-C21   | 120.4(9)  |
| C22-C23-C24   | 116.4(11) | C25-C24-C23   | 120.3(10) |
| C24-C25-C27   | 119.5(11) | N3-C26-C34    | 115.0(6)  |
| N6-C27-C25    | 122.4(10) | N1-C28-C29B   | 124.7(10) |
| N1-C28-C29A   | 102.7(9)  | C29A-N8A-C33A | 117.3(9)  |
| N8A-C29A-C30A | 123.8(9)  | N8A-C29A-C28  | 117.1(13) |

|               |           |                |           |
|---------------|-----------|----------------|-----------|
| C30A-C29A-C28 | 118.2(14) | C29A-C30A-C31A | 118.3(10) |
| C32A-C31A-    | 118.7(11) | C31A-C32A-C33A | 119.2(10) |
| N8A-C33A-C32A | 122.6(11) | C29B-N8B-C33B  | 117.3(9)  |
| N8B-C29B-C30B | 123.8(9)  | N8B-C29B-C28   | 114.1(12) |
| C30B-C29B-C28 | 121.8(12) | C29B-C30B-C31B | 118.3(10) |
| C32B-C31B-    | 118.7(11) | C31B-C32B-C33B | 119.2(10) |
| N8B-C33B-C32B | 122.7(11) | C34-N7-C38     | 117.5(8)  |
| N7-C34-C35    | 123.8(7)  | N7-C34-C26     | 117.5(6)  |
| C35-C34-C26   | 118.7(7)  | C34-C35-C36    | 118.1(9)  |
| C37-C36-C35   | 118.8(10) | C36-C37-C38    | 119.3(9)  |
| N7-C38-C37    | 122.4(10) | F2-P1-F5       | 93.1(4)   |
| F2-P1-F4      | 178.7(5)  | F5-P1-F4       | 88.3(4)   |
| F2-P1-F6      | 88.7(4)   | F5-P1-F6       | 178.0(4)  |
| F4-P1-F6      | 90.0(4)   | F2-P1-F1       | 90.3(4)   |
| F5-P1-F1      | 90.5(4)   | F4-P1-F1       | 89.7(3)   |
| F6-P1-F1      | 90.4(4)   | F2-P1-F3       | 90.4(3)   |
| F5-P1-F3      | 91.4(3)   | F4-P1-F3       | 89.6(3)   |
| F6-P1-F3      | 87.7(3)   | F1-P1-F3       | 178.0(4)  |
| F2A-P2A-F5A   | 92.9(6)   | F2A-P2A-F4A    | 178.7(7)  |
| F5A-P2A-F4A   | 88.4(6)   | F2A-P2A-F6A    | 88.4(6)   |
| F5A-P2A-F6A   | 178.3(7)  | F4A-P2A-F6A    | 90.3(6)   |
| F2A-P2A-F1A   | 90.3(5)   | F5A-P2A-F1A    | 90.2(6)   |
| F4A-P2A-F1A   | 89.9(5)   | F6A-P2A-F1A    | 90.8(6)   |
| F2A-P2A-F3A   | 90.0(5)   | F5A-P2A-F3A    | 91.4(6)   |
| F4A-P2A-F3A   | 89.8(5)   | F6A-P2A-F3A    | 87.5(5)   |
| F1A-P2A-F3A   | 178.3(6)  | F2B-P2B-F5B    | 92.8(6)   |
| F2B-P2B-F4B   | 178.9(7)  | F5B-P2B-F4B    | 88.3(6)   |
| F2B-P2B-F6B   | 88.5(6)   | F5B-P2B-F6B    | 178.5(7)  |
| F4B-P2B-F6B   | 90.4(6)   | F2B-P2B-F1B    | 90.3(6)   |
| F5B-P2B-F1B   | 89.8(6)   | F4B-P2B-F1B    | 89.8(6)   |
| F6B-P2B-F1B   | 90.8(6)   | F2B-P2B-F3B    | 90.0(6)   |
| F5B-P2B-F3B   | 91.6(6)   | F4B-P2B-F3B    | 89.9(5)   |
| F6B-P2B-F3B   | 87.8(6)   | F1B-P2B-F3B    | 178.5(7)  |

**Table S6. Torsion angles (°) for 3.**

---

|                 |           |                 |           |
|-----------------|-----------|-----------------|-----------|
| C7-N1-C1-N2     | -1.4(8)   | C28-N1-C1-N2    | -174.2(7) |
| C7-N1-C1-Ni1    | 168.9(6)  | C28-N1-C1-Ni1   | -4.0(12)  |
| C2-N2-C1-N1     | 0.4(8)    | C21-N2-C1-N1    | 171.7(6)  |
| C2-N2-C1-Ni1    | -171.6(5) | C21-N2-C1-Ni1   | -0.3(9)   |
| C8-Ni1-C1-N1    | 53.2(7)   | N6-Ni1-C1-N1    | -125.5(7) |
| C8-Ni1-C1-N2    | -137.5(6) | N6-Ni1-C1-N2    | 43.8(6)   |
| C1-N2-C2-C3     | -178.6(9) | C21-N2-C2-C3    | 10.8(14)  |
| C1-N2-C2-C7     | 0.8(8)    | C21-N2-C2-C7    | -169.8(7) |
| N2-C2-C3-C4     | -179.1(9) | C7-C2-C3-C4     | 1.6(15)   |
| C2-C3-C4-C5     | -1.7(18)  | C3-C4-C5-C6     | 2.(2)     |
| C4-C5-C6-C7     | -1.1(18)  | C5-C6-C7-N1     | -178.0(9) |
| C5-C6-C7-C2     | 1.1(14)   | C1-N1-C7-C6     | -179.0(9) |
| C28-N1-C7-C6    | -5.8(14)  | C1-N1-C7-C2     | 1.8(8)    |
| C28-N1-C7-C2    | 175.0(8)  | N2-C2-C7-C6     | 179.2(7)  |
| C3-C2-C7-C6     | -1.4(13)  | N2-C2-C7-N1     | -1.5(8)   |
| C3-C2-C7-N1     | 177.9(8)  | C9-N3-C8-N4     | -0.1(7)   |
| C26-N3-C8-N4    | -171.7(6) | C9-N3-C8-Ni1    | -179.9(5) |
| C26-N3-C8-Ni1   | 8.5(11)   | C14-N4-C8-N3    | 0.5(8)    |
| C15-N4-C8-N3    | 170.3(6)  | C14-N4-C8-Ni1   | -179.6(5) |
| C15-N4-C8-Ni1   | -9.8(9)   | C1-Ni1-C8-N3    | 52.1(7)   |
| N5-Ni1-C8-N3    | -128.6(7) | C1-Ni1-C8-N4    | -127.7(6) |
| N5-Ni1-C8-N4    | 51.6(5)   | C8-N3-C9-C10    | 179.9(8)  |
| C26-N3-C9-C10   | -8.4(12)  | C8-N3-C9-C14    | -0.4(8)   |
| C26-N3-C9-C14   | 171.3(6)  | C14-C9-C10-C11  | 0.3(11)   |
| N3-C9-C10-C11   | 179.9(7)  | C9-C10-C11-C12  | 0.3(12)   |
| C10-C11-C12-C13 | -0.3(14)  | C11-C12-C13-C14 | -0.2(12)  |
| C12-C13-C14-C9  | 0.8(11)   | C12-C13-C14-N4  | 179.1(8)  |
| C10-C9-C14-C13  | -0.9(11)  | N3-C9-C14-C13   | 179.4(7)  |
| C10-C9-C14-N4   | -179.6(7) | N3-C9-C14-N4    | 0.7(7)    |
| C8-N4-C14-C13   | -179.3(8) | C15-N4-C14-C13  | 11.8(13)  |
| C8-N4-C14-C9    | -0.8(8)   | C15-N4-C14-C9   | -169.7(7) |
| C8-N4-C15-C16   | -51.4(9)  | C14-N4-C15-C16  | 116.6(8)  |
| C17-N5-C16-C20  | 3.5(10)   | Ni1-N5-C16-C20  | 179.0(6)  |
| C17-N5-C16-C15  | -174.0(6) | Ni1-N5-C16-C15  | 1.4(8)    |
| N4-C15-C16-N5   | 54.5(9)   | N4-C15-C16-C20  | -123.0(8) |
| C16-N5-C17-C18  | -1.5(11)  | Ni1-N5-C17-C18  | -176.9(6) |



|                     |            |                     |            |
|---------------------|------------|---------------------|------------|
| N5-C17-C18-C19      | -2.1(12)   | C17-C18-C19-C20     | 3.5(14)    |
| C18-C19-C20-C16     | -1.6(14)   | N5-C16-C20-C19      | -2.0(13)   |
| C15-C16-C20-C19     | 175.4(8)   | C1-N2-C21-C22       | -54.8(9)   |
| C2-N2-C21-C22       | 114.7(8)   | C27-N6-C22-C23      | 4.0(13)    |
| Ni1-N6-C22-C23      | -176.0(8)  | C27-N6-C22-C21      | -172.9(7)  |
| Ni1-N6-C22-C21      | 7.1(10)    | N2-C21-C22-N6       | 49.2(9)    |
| N2-C21-C22-C23      | -127.8(10) | N6-C22-C23-C24      | -4.1(17)   |
| C21-C22-C23-C24     | 172.7(11)  | C22-C23-C24-C25     | 3.(2)      |
| C23-C24-C25-C27     | -2.(2)     | C8-N3-C26-C34       | -95.9(8)   |
| C9-N3-C26-C34       | 93.7(8)    | C22-N6-C27-C25      | -2.8(14)   |
| Ni1-N6-C27-C25      | 177.2(9)   | C24-C25-C27-N6      | 2.(2)      |
| C1-N1-C28-C29B      | 76.7(14)   | C7-N1-C28-C29B      | -95.4(13)  |
| C1-N1-C28-C29A      | 85.8(11)   | C7-N1-C28-C29A      | -86.2(11)  |
| C33A-N8A-C29A-C30A  | -0.01(16)  | C33A-N8A-C29A-C28   | -169.0(15) |
| N1-C28-C29A-N8A     | -52.6(13)  | N1-C28-C29A-C30A    | 137.7(10)  |
| N8A-C29A-C30A-C31A  | -0.01(16)  | C28-C29A-C30A-C31A  | 168.9(15)  |
| C29A-C30A-C31A-C32A | 0.0(4)     | C30A-C31A-C32A-C33A | 0.0(5)     |
| C29A-N8A-C33A-C32A  | 0.0(4)     | C31A-C32A-C33A-N8A  | 0.0(5)     |
| C33B-N8B-C29B-C30B  | 0.02(16)   | C33B-N8B-C29B-C28   | 174.7(13)  |
| N1-C28-C29B-N8B     | -55.0(15)  | N1-C28-C29B-C30B    | 119.8(10)  |
| N8B-C29B-C30B-C31B  | -0.02(16)  | C28-C29B-C30B-C31B  | -174.3(14) |
| C29B-C30B-C31B-C32B | 0.1(3)     | C30B-C31B-C32B-C33B | -0.1(5)    |
| C29B-N8B-C33B-C32B  | -0.1(4)    | C31B-C32B-C33B-N8B  | 0.1(5)     |
| C38-N7-C34-C35      | 0.1(12)    | C38-N7-C34-C26      | -178.8(7)  |
| N3-C26-C34-N7       | -28.3(9)   | N3-C26-C34-C35      | 152.7(7)   |
| N7-C34-C35-C36      | -1.0(13)   | C26-C34-C35-C36     | 177.9(8)   |
| C34-C35-C36-C37     | 1.4(15)    | C35-C36-C37-C38     | -0.9(17)   |
| C34-N7-C38-C37      | 0.4(14)    | C36-C37-C38-N7      | 0.1(17)    |

**Table S7. Anisotropic atomic displacement parameters ( $\text{\AA}^2$ ) for 3.**

The anisotropic atomic displacement factor exponent takes the form:  $-2\pi^2 [h^2 a^{*2} U_{11} + \dots + 2 h k a^* b^* U_{12}]$

|     | $U_{11}$  | $U_{22}$  | $U_{33}$  | $U_{23}$   | $U_{13}$   | $U_{12}$   |
|-----|-----------|-----------|-----------|------------|------------|------------|
| Ni1 | 0.0434(5) | 0.0376(5) | 0.0429(5) | -0.0012(4) | 0.0091(4)  | -0.0031(4) |
| N1  | 0.046(3)  | 0.043(3)  | 0.076(5)  | -0.002(3)  | 0.020(3)   | 0.004(3)   |
| N2  | 0.045(3)  | 0.038(3)  | 0.067(4)  | -0.001(3)  | 0.007(3)   | 0.002(3)   |
| N3  | 0.044(3)  | 0.037(3)  | 0.043(3)  | -0.005(2)  | 0.011(3)   | -0.001(2)  |
| N4  | 0.061(4)  | 0.042(3)  | 0.036(3)  | -0.004(3)  | 0.019(3)   | -0.004(3)  |
| N5  | 0.045(3)  | 0.039(3)  | 0.041(3)  | -0.003(2)  | 0.007(2)   | -0.008(2)  |
| N6  | 0.046(3)  | 0.046(4)  | 0.057(4)  | -0.002(3)  | 0.003(3)   | -0.001(3)  |
| C1  | 0.040(4)  | 0.044(4)  | 0.049(4)  | -0.002(3)  | 0.011(3)   | -0.005(3)  |
| C2  | 0.045(4)  | 0.042(4)  | 0.090(7)  | 0.013(4)   | -0.010(4)  | 0.001(3)   |
| C3  | 0.083(7)  | 0.070(7)  | 0.109(9)  | 0.005(6)   | 0.002(6)   | 0.015(6)   |
| C4  | 0.092(9)  | 0.062(7)  | 0.180(15) | 0.030(9)   | -0.026(9)  | 0.024(6)   |
| C5  | 0.082(8)  | 0.056(7)  | 0.172(14) | -0.007(8)  | 0.002(9)   | 0.025(6)   |
| C6  | 0.061(6)  | 0.051(5)  | 0.138(10) | 0.003(6)   | 0.014(6)   | 0.014(4)   |
| C7  | 0.041(4)  | 0.045(4)  | 0.105(7)  | -0.006(5)  | 0.018(4)   | 0.000(3)   |
| C8  | 0.045(4)  | 0.035(4)  | 0.050(4)  | -0.001(3)  | 0.015(3)   | 0.003(3)   |
| C9  | 0.041(4)  | 0.048(4)  | 0.046(4)  | -0.009(3)  | 0.011(3)   | 0.004(3)   |
| C10 | 0.054(4)  | 0.063(5)  | 0.055(5)  | -0.020(4)  | 0.016(4)   | -0.012(4)  |
| C11 | 0.055(5)  | 0.073(6)  | 0.057(5)  | -0.023(4)  | 0.006(4)   | -0.008(4)  |
| C12 | 0.067(5)  | 0.078(6)  | 0.044(4)  | -0.019(4)  | -0.004(4)  | 0.011(5)   |
| C13 | 0.065(5)  | 0.062(5)  | 0.042(4)  | -0.006(4)  | 0.011(4)   | 0.010(4)   |
| C14 | 0.051(4)  | 0.043(4)  | 0.037(4)  | -0.003(3)  | 0.005(3)   | 0.003(3)   |
| C15 | 0.071(5)  | 0.055(5)  | 0.059(5)  | 0.007(4)   | 0.026(4)   | -0.011(4)  |
| C16 | 0.057(4)  | 0.043(4)  | 0.038(4)  | -0.001(3)  | 0.010(3)   | -0.011(3)  |
| C17 | 0.051(4)  | 0.046(4)  | 0.053(4)  | -0.006(3)  | 0.013(3)   | -0.003(3)  |
| C18 | 0.059(5)  | 0.050(5)  | 0.072(6)  | -0.010(4)  | 0.012(4)   | 0.002(4)   |
| C19 | 0.091(7)  | 0.052(5)  | 0.078(7)  | 0.006(5)   | 0.005(5)   | 0.009(5)   |
| C20 | 0.097(7)  | 0.047(5)  | 0.056(5)  | 0.015(4)   | 0.006(5)   | -0.008(4)  |
| C21 | 0.065(5)  | 0.054(5)  | 0.046(4)  | -0.002(4)  | 0.006(4)   | 0.012(4)   |
| C22 | 0.060(5)  | 0.043(4)  | 0.061(5)  | -0.009(4)  | -0.014(4)  | 0.003(4)   |
| C23 | 0.121(9)  | 0.073(7)  | 0.072(7)  | -0.002(5)  | -0.041(6)  | -0.010(6)  |
| C24 | 0.153(13) | 0.073(8)  | 0.134(12) | -0.002(8)  | -0.072(10) | -0.028(8)  |
| C25 | 0.106(9)  | 0.072(7)  | 0.120(10) | 0.022(7)   | -0.038(8)  | -0.032(6)  |

|      | $U_{11}$   | $U_{22}$   | $U_{33}$   | $U_{23}$    | $U_{13}$   | $U_{12}$   |
|------|------------|------------|------------|-------------|------------|------------|
| C26  | 0.050(4)   | 0.042(4)   | 0.047(4)   | -0.003(3)   | 0.017(3)   | -0.007(3)  |
| C27  | 0.059(5)   | 0.048(5)   | 0.091(7)   | 0.001(5)    | 0.002(5)   | -0.015(4)  |
| C28  | 0.093(7)   | 0.065(6)   | 0.093(7)   | 0.001(5)    | 0.059(6)   | 0.017(5)   |
| N8A  | 0.147(17)  | 0.124(15)  | 0.159(18)  | -0.006(16)  | 0.068(15)  | -0.032(14) |
| C29A | 0.085(14)  | 0.076(12)  | 0.108(16)  | 0.013(12)   | 0.064(13)  | 0.003(11)  |
| C30A | 0.093(15)  | 0.118(16)  | 0.116(17)  | 0.009(14)   | 0.063(14)  | 0.011(13)  |
| C31A | 0.090(15)  | 0.167(19)  | 0.15(2)    | 0.016(17)   | 0.071(15)  | -0.002(15) |
| C32A | 0.102(16)  | 0.154(18)  | 0.17(2)    | 0.025(18)   | 0.054(15)  | -0.036(15) |
| C33A | 0.149(19)  | 0.132(17)  | 0.17(2)    | 0.003(17)   | 0.058(17)  | -0.041(16) |
| N8B  | 0.077(10)  | 0.054(8)   | 0.109(13)  | 0.013(9)    | 0.040(9)   | -0.006(8)  |
| C29B | 0.072(12)  | 0.055(10)  | 0.068(12)  | -0.013(9)   | 0.019(10)  | 0.004(9)   |
| C30B | 0.082(14)  | 0.117(15)  | 0.090(15)  | -0.023(12)  | 0.041(12)  | -0.011(12) |
| C31B | 0.076(13)  | 0.138(17)  | 0.103(16)  | 0.000(15)   | 0.030(12)  | -0.019(13) |
| C32B | 0.072(12)  | 0.132(16)  | 0.098(15)  | 0.017(14)   | 0.024(11)  | -0.038(12) |
| C33B | 0.092(14)  | 0.103(14)  | 0.123(17)  | 0.032(13)   | 0.032(13)  | -0.017(12) |
| N7   | 0.067(4)   | 0.042(4)   | 0.080(5)   | -0.012(3)   | 0.018(4)   | -0.002(3)  |
| C34  | 0.044(4)   | 0.046(4)   | 0.058(5)   | 0.005(4)    | 0.006(3)   | -0.010(3)  |
| C35  | 0.076(6)   | 0.076(6)   | 0.066(6)   | 0.024(5)    | 0.001(5)   | -0.015(5)  |
| C36  | 0.094(8)   | 0.095(9)   | 0.101(9)   | 0.047(8)    | -0.023(7)  | -0.019(7)  |
| C37  | 0.072(7)   | 0.049(6)   | 0.183(15)  | 0.023(8)    | -0.017(8)  | 0.003(5)   |
| C38  | 0.079(7)   | 0.046(5)   | 0.133(11)  | 0.001(6)    | 0.005(7)   | 0.006(5)   |
| P1   | 0.0550(12) | 0.0713(14) | 0.0461(11) | -0.0077(10) | 0.0149(9)  | 0.0098(10) |
| F1   | 0.126(5)   | 0.190(8)   | 0.058(3)   | 0.002(4)    | 0.042(3)   | 0.076(5)   |
| F2   | 0.155(6)   | 0.110(5)   | 0.091(4)   | 0.037(4)    | 0.043(4)   | 0.055(5)   |
| F3   | 0.086(3)   | 0.077(3)   | 0.058(3)   | -0.020(2)   | 0.033(3)   | 0.001(3)   |
| F4   | 0.111(5)   | 0.100(5)   | 0.107(5)   | 0.033(4)    | 0.047(4)   | 0.043(4)   |
| F5   | 0.075(4)   | 0.156(6)   | 0.093(4)   | 0.004(4)    | 0.011(3)   | -0.041(4)  |
| F6   | 0.086(4)   | 0.134(6)   | 0.120(5)   | -0.067(5)   | 0.000(4)   | -0.011(4)  |
| P2A  | 0.066(4)   | 0.063(4)   | 0.051(4)   | -0.014(3)   | 0.012(3)   | -0.004(3)  |
| F1A  | 0.088(10)  | 0.142(16)  | 0.21(2)    | 0.084(16)   | 0.027(11)  | -0.036(11) |
| F2A  | 0.164(18)  | 0.187(18)  | 0.047(7)   | -0.008(9)   | -0.022(10) | -0.045(15) |
| F3A  | 0.135(15)  | 0.26(2)    | 0.168(16)  | -0.104(16)  | 0.059(13)  | -0.111(16) |
| F4A  | 0.19(2)    | 0.28(3)    | 0.091(11)  | 0.005(14)   | 0.020(13)  | 0.007(19)  |
| F5A  | 0.22(2)    | 0.092(12)  | 0.24(2)    | -0.020(14)  | 0.05(2)    | 0.045(14)  |
| F6A  | 0.20(2)    | 0.161(18)  | 0.26(3)    | -0.009(19)  | 0.03(2)    | 0.091(16)  |
| P2B  | 0.096(7)   | 0.125(9)   | 0.093(7)   | -0.025(6)   | 0.037(5)   | -0.022(6)  |
| F1B  | 0.19(2)    | 0.131(16)  | 0.22(2)    | -0.021(16)  | 0.077(17)  | -0.045(15) |
| F2B  | 0.135(16)  | 0.25(2)    | 0.22(2)    | 0.01(2)     | -0.032(16) | 0.026(17)  |
| F3B  | 0.17(2)    | 0.110(14)  | 0.29(3)    | -0.011(16)  | 0.00(2)    | -0.032(15) |

|     | $U_{11}$  | $U_{22}$ | $U_{33}$  | $U_{23}$   | $U_{13}$   | $U_{12}$   |
|-----|-----------|----------|-----------|------------|------------|------------|
| F4B | 0.146(16) | 0.22(2)  | 0.23(2)   | -0.076(19) | -0.020(17) | 0.095(16)  |
| F5B | 0.174(19) | 0.28(3)  | 0.115(15) | -0.070(16) | 0.098(14)  | -0.071(19) |
| F6B | 0.25(2)   | 0.20(2)  | 0.144(16) | -0.040(15) | 0.080(16)  | 0.083(18)  |
| O1S | 0.075(7)  | 0.061(6) | 0.073(7)  | 0.009(5)   | 0.026(6)   | 0.005(5)   |
| C1S | 0.079(9)  | 0.062(8) | 0.061(8)  | 0.005(6)   | 0.023(7)   | 0.015(7)   |

**Table S8. Hydrogen atomic coordinates and isotropic atomic displacement parameters ( $\text{\AA}^2$ ) for 3.**

|      | <b>x/a</b> | <b>y/b</b> | <b>z/c</b> | <b>U(eq)</b> |
|------|------------|------------|------------|--------------|
| H3   | 0.4272     | 0.1053     | 0.9206     | 0.109000     |
| H4   | 0.4655     | -0.0478    | 0.9225     | 0.146000     |
| H5   | 0.4757     | -0.1159    | 0.8210     | 0.131000     |
| H6   | 0.4518     | -0.0330    | 0.7145     | 0.102000     |
| H10  | 0.2627     | 0.0407     | 0.5279     | 0.068000     |
| H11  | 0.2441     | 0.0480     | 0.4048     | 0.076000     |
| H12  | 0.2652     | 0.1802     | 0.3419     | 0.079000     |
| H13  | 0.3059     | 0.3148     | 0.3980     | 0.068000     |
| H15A | 0.3409     | 0.4475     | 0.4848     | 0.072000     |
| H15B | 0.3737     | 0.4238     | 0.5488     | 0.072000     |
| H17  | 0.3277     | 0.5496     | 0.7302     | 0.060000     |
| H18  | 0.2954     | 0.7024     | 0.6848     | 0.073000     |
| H19  | 0.2904     | 0.7479     | 0.5677     | 0.092000     |
| H20  | 0.3133     | 0.6253     | 0.4984     | 0.082000     |
| H21A | 0.3944     | 0.2797     | 0.8905     | 0.068000     |
| H21B | 0.3591     | 0.3055     | 0.8322     | 0.068000     |
| H23  | 0.4237     | 0.4534     | 0.9297     | 0.121000     |
| H24  | 0.4532     | 0.6126     | 0.9001     | 0.168000     |
| H25  | 0.4433     | 0.6645     | 0.7868     | 0.134000     |
| H26A | 0.2774     | 0.1170     | 0.6499     | 0.054000     |
| H26B | 0.3045     | 0.1922     | 0.7025     | 0.054000     |
| H27  | 0.4086     | 0.5562     | 0.7009     | 0.083000     |
| H28A | 0.3860     | 0.1669     | 0.5959     | 0.092000     |
| H28B | 0.4117     | 0.0639     | 0.6178     | 0.092000     |
| H30A | 0.4656     | 0.1036     | 0.5771     | 0.123000     |
| H31A | 0.5092     | 0.2250     | 0.5562     | 0.153000     |
| H32A | 0.5097     | 0.4063     | 0.5946     | 0.167000     |
| H33A | 0.4674     | 0.4624     | 0.6520     | 0.177000     |
| H30B | 0.4594     | 0.0800     | 0.5681     | 0.111000     |
| H31B | 0.4991     | 0.1945     | 0.5279     | 0.125000     |
| H32B | 0.4927     | 0.3847     | 0.5347     | 0.120000     |
| H33B | 0.4477     | 0.4558     | 0.5800     | 0.126000     |
| H35  | 0.3193     | 0.0521     | 0.7908     | 0.091000     |
| H36  | 0.3526     | -0.1077    | 0.8312     | 0.126000     |

|      | <b>x/a</b> | <b>y/b</b> | <b>z/c</b> | <b>U(eq)</b> |
|------|------------|------------|------------|--------------|
| H37  | 0.3783     | -0.2049    | 0.7551     | 0.132000     |
| H38  | 0.3693     | -0.1458    | 0.6414     | 0.108000     |
| H1S1 | 0.3553     | 0.8907     | 0.4355     | 0.099000     |
| H1S2 | 0.3169     | 0.9308     | 0.4383     | 0.099000     |
| H1S3 | 0.3395     | 0.8557     | 0.4978     | 0.099000     |

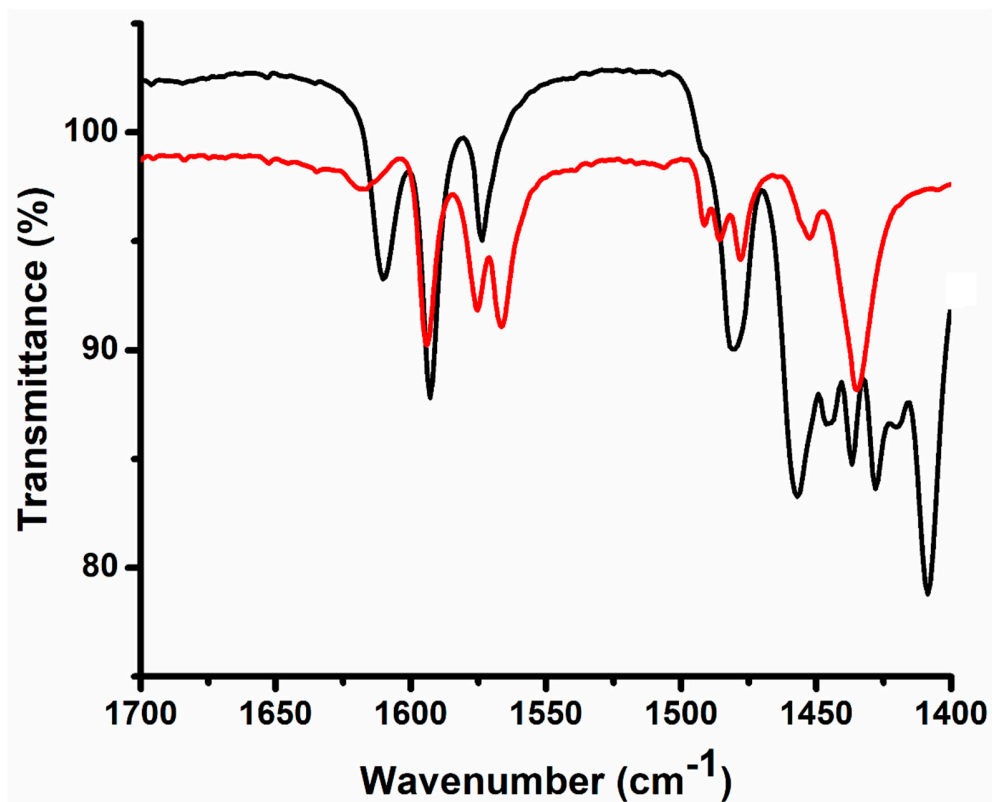

**Figure S3.** FT-IR spectra of (a) Comparison of compound **2** (red) and complex **3** (black).

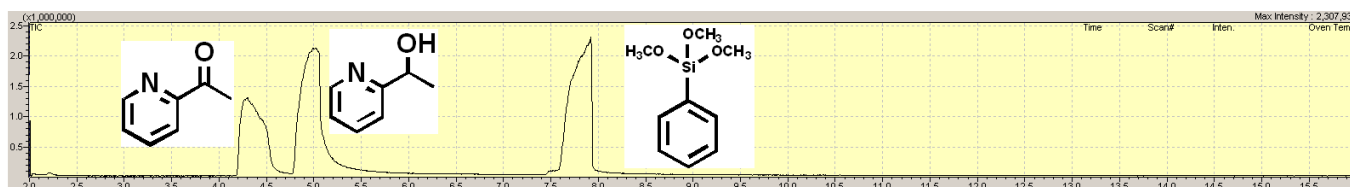

**Figure S4.** A typical GC spectrum for the complex **3** catalyzed formation of 1-(pyridin-2-yl)ethan-1-ol from 2-acetylpyridine.

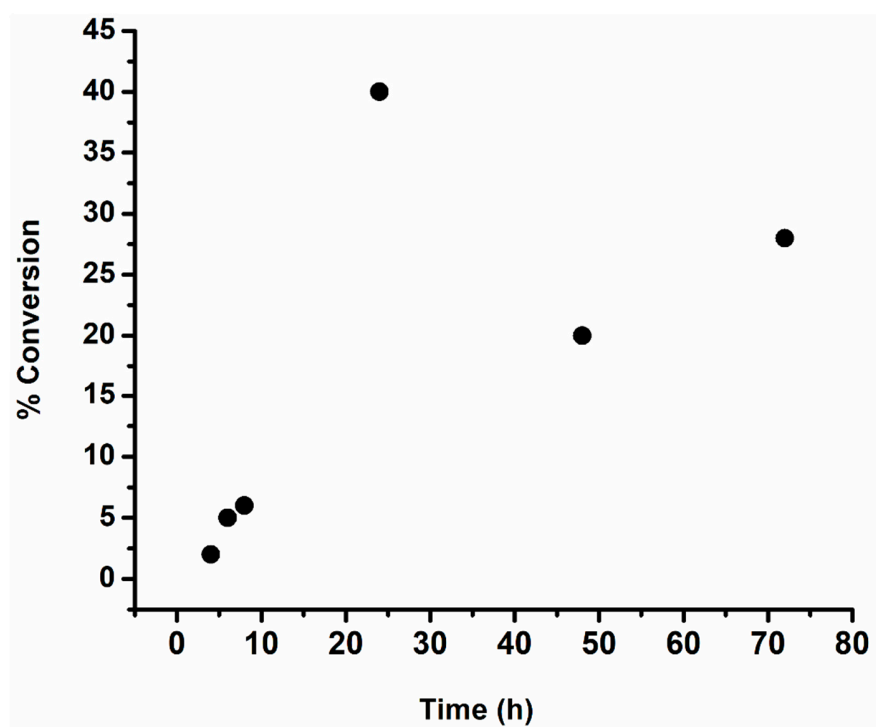

**Figure S5.** Plot for the % conversion of 1-(pyridin-2-yl)ethan-1-ol catalyzed by **3** as a function of time.



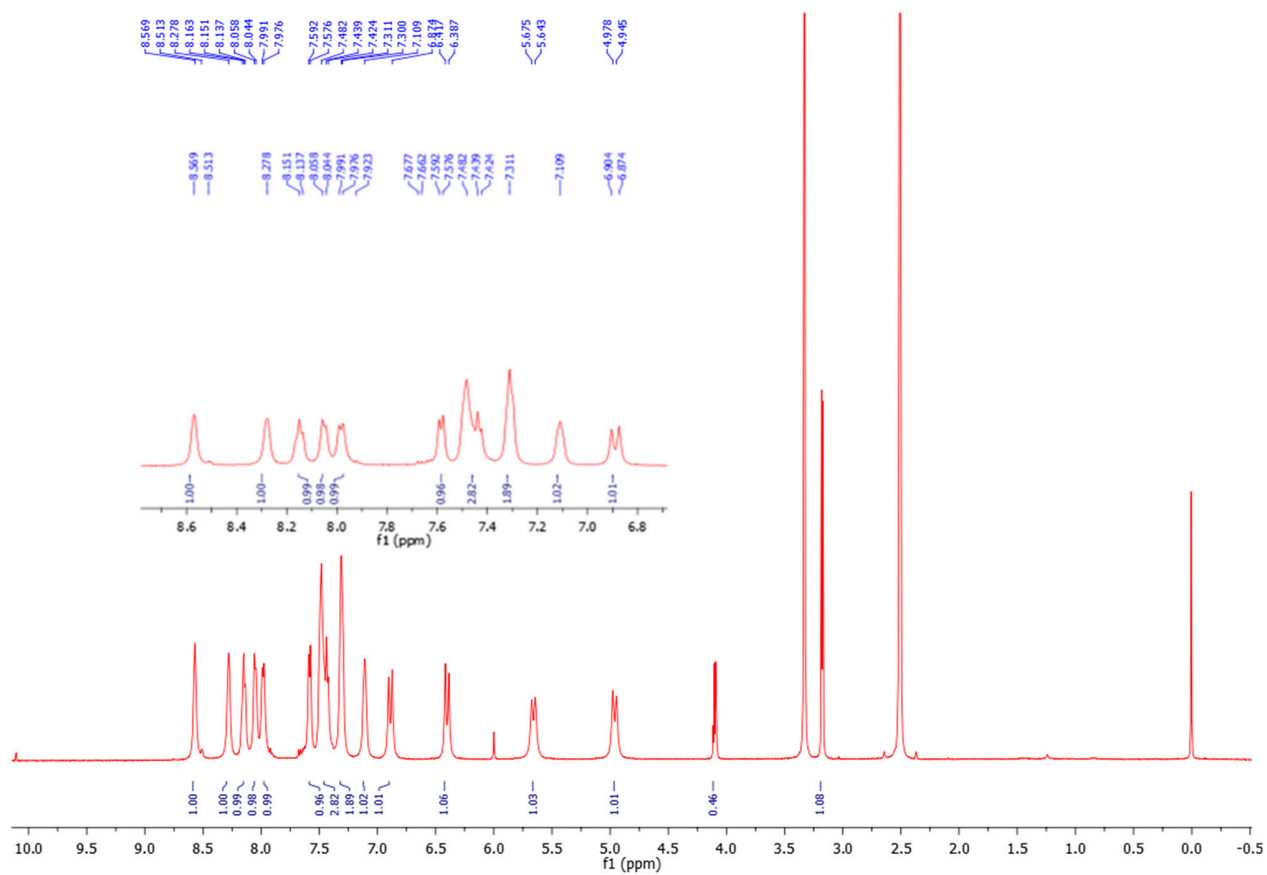

**Figure S6.**  $^1\text{H}$  NMR of complex **3**.

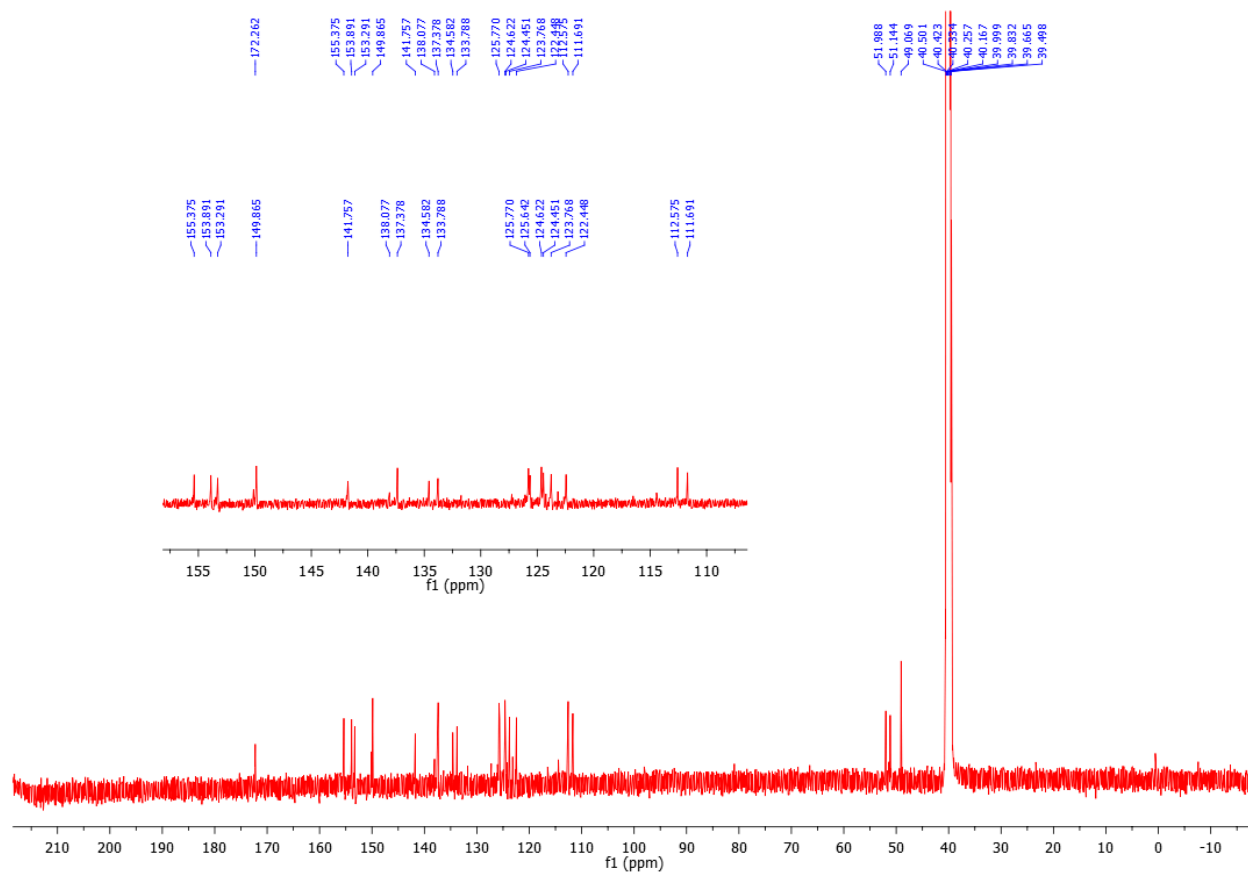

**Figure S7.**  $^{13}\text{C}$  NMR of complex **3**.

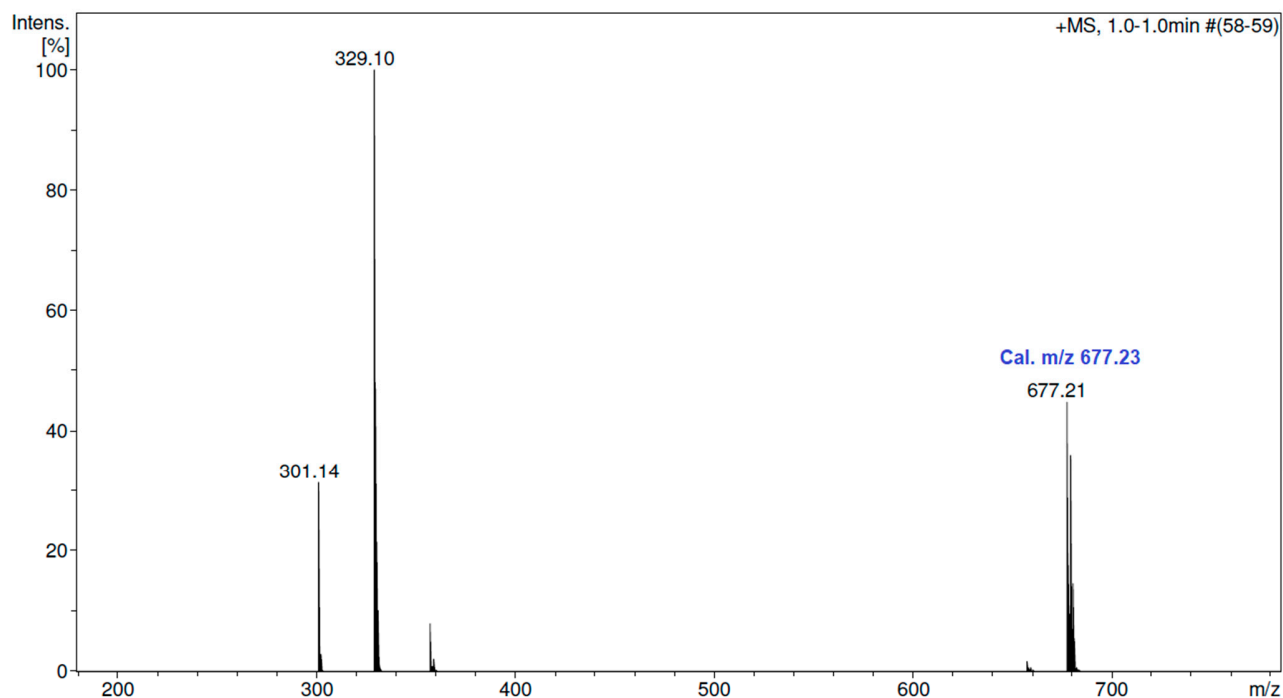

**Figure S8.** ESI-MS of complex **3** in CH<sub>3</sub>CN solution.

## References

**R1** Saint Program included in the package software: APEX4 v2021.10.0.

**R2** Bruker, *Program name*. Bruker AXS Inc. **2001**, Madison, Wisconsin, USA.

**R3** SHELXT-Integrated space-group and crystal-structure determination Sheldrick, G. M. *Acta Crystallogr., Sect. A* **2015**, *A71*, 3-8.

**R4**, Ver, G. M. SHELXTL Sheldrick, *Acta Crystallographica. Sect C Structural Chemistry*, **2018**, *71*, 3 - 8.

**R5** APEX4 v2021, 10.0, AXS Bruker program.
